# Supplementary material for: Construction of helical networks by using multiple V-shaped mixed ligand systems
Source: Royal Society of Chemistry journal article supplement (doi:10.1039/c1ce05380a), 2011-11-03
Supplement: c1ce05380a.pdf [file c1ce05380a.pdf]

**Article title:** Construction of helical networks by using multiple V-shaped mixed ligand systems

**Authors:** Arijit Goswami, Satirtha Sengupta, Raju Mondal\*

**Journal:** CrystEngComm

**Manuscript ID:** CE-ART-03-2011-005380

---

**Thermal analysis:**

In order to characterize the compounds in terms of thermal stability, their thermal behaviors were studied by TGA. The experiment was performed on crystalline samples of **1, 2, 3, 4** and **6** under nitrogen atmosphere with a heating rate of 10°C/min. Both of the

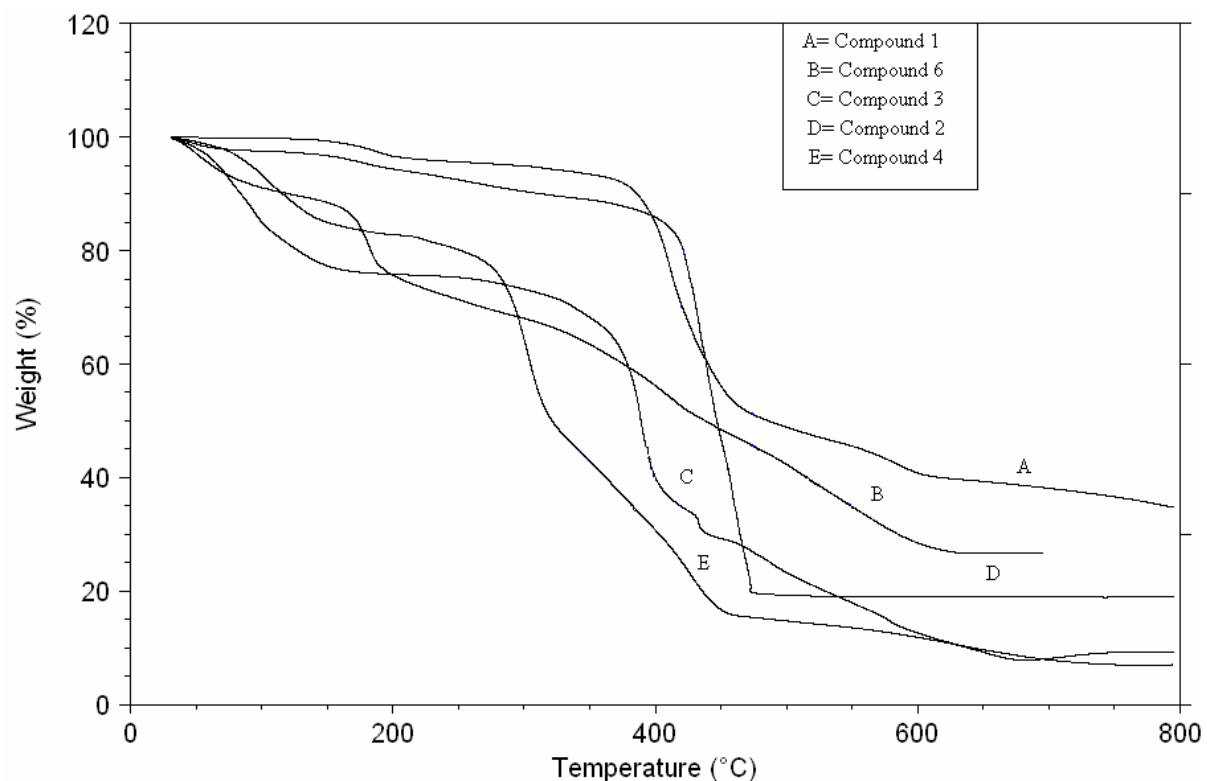

**Figure ESI 1:** TGA plot for compound **1,2,3,4** and **6**

compounds **1** and **2** do not show any significant weight loss upto 400° C and 450° C, respectively. After that both the compounds start degrading rapidly. This is in good agreement with the crystal structure supporting the absence of any trapped solvent molecule inside the framework. Compound **3**, however, shows almost 25% weight loss around 150° C indicating the removal of the solvent molecules. No further weight loss is observed upto 350° C and thereafter rapid degradation takes place. Compound **4** also shows an approximate 20% weight loss between room temperature and 275° C corresponding to the removal of the trapped solvent molecules and after that it starts degrading quickly. Compound **6** shows a 25% weight loss *ca.* 200° C corresponding to the removal of water molecules present in the framework and then shows a rapid degradation.

## TOPOS data of Compound 1.

#####

1:C25 H24 N4 O5 Zn

#####

Structure consists of molecules (ZD1). The composition of molecule is Zn

Topology for ZD1

-----

Atom ZD1 links by bridge ligands and has

| Common vertex with                   | R(A-A)  |   |       | f | Total SA |
|--------------------------------------|---------|---|-------|---|----------|
| ZD 1 1.3012 1.6988 0.9167 ( 1 1 0)   | 9.649A  | 1 | 23.72 |   |          |
| ZD 1 -0.6988 -0.3012 0.9167 (-1-1 0) | 9.649A  | 1 | 23.72 |   |          |
| ZD 1 1.6988 1.3976 0.7500 ( 1 1-1)   | 14.181A | 1 | 26.28 |   |          |
| ZD 1 -0.3976 -0.6988 1.0833 ( 0-1 0) | 14.181A | 1 | 26.28 |   |          |

-----

Structural group analysis

-----

-----

Structural group No 1

-----

Structure consists of 3D framework with ZD

Coordination sequences

-----

ZD1: 1 2 3 4 5 6 7 8 9 10

Num 4 12 36 72 122 188 264 354 456 570

Cum 5 17 53 125 247 435 699 1053 1509 2079

-----

TD10=2079

Vertex symbols for selected sublattice

-----

ZD1 Point (Schlafli) symbol: {7^5;9}

Extended point symbol:[7(2).9(2).7(3).7(3).7(3).7(3)]

-----  
Point (Schlafli) symbol for net: {7^5;9}

4-c net; uninodal net

Topological type: qzd quartz-dual, "dense" net (topos&RCSR.ttd) {7^5;9} - VS [7(2).\*.7(3).7(3).7(3).7(3)]  
(67371 types in 9 databases)

-----  
Non-equivalent circuits

-----  
Circuit No 1; Type=7a; Centroid: (0.787,0.213,0.917)

-----  
Atom    x    y    z

-----  
ZD1    0.3012 0.6988 0.9167

ZD1    -0.3976 -0.6988 1.0833

ZD1    -0.3976 -1.6988 1.0833

ZD1    0.3012 -0.3012 0.9167

ZD1    1.3012 0.6988 0.9167

ZD1    2.6988 1.3976 0.7500

ZD1    1.6988 1.3976 0.7500

Circuit No 2; Type=7b; Centroid: (0.215,0.785,0.917)

-----  
Atom    x    y    z

-----  
ZD1    0.3012 0.6988 0.9167

ZD1    -0.3976 -0.6988 1.0833

ZD1    -0.3976 0.3012 1.0833

ZD1    0.3012 1.6988 0.9167

ZD1    -0.6988 0.6988 0.9167

ZD1    0.6988 1.3976 0.7500

ZD1 1.6988 1.3976 0.7500

Circuit No 3; Type=9a; Centroid: (0.679,0.321,0.917)

-----

Atom x y z

-----

ZD1 0.3012 0.6988 0.9167

ZD1 1.3012 1.6988 0.9167

ZD1 0.6024 0.3012 1.0833

ZD1 0.6024 -0.6988 1.0833

ZD1 1.3012 0.6988 0.9167

ZD1 0.3012 -0.3012 0.9167

ZD1 1.6988 0.3976 0.7500

ZD1 0.6988 0.3976 0.7500

ZD1 -0.6988 -0.3012 0.9167

Circuit No 4; Type=9b; Centroid: (0.234,0.766,0.917)

-----

Atom x y z

-----

ZD1 0.3012 0.6988 0.9167

ZD1 -0.6988 -0.3012 0.9167

ZD1 -1.3976 -1.6988 1.0833

ZD1 -1.3976 -0.6988 1.0833

ZD1 -0.6988 0.6988 0.9167

ZD1 0.3012 1.6988 0.9167

ZD1 1.6988 2.3976 0.7500

ZD1 2.6988 2.3976 0.7500

Elapsed time: 5.83 sec.

**Table S-1: Selected Bond Lengths (Å) and Angles (°) for Compounds 1-9**

| <b>Compound 1</b>                            |          |                                                                           |          | <b>Compound 2</b>                            |          |                                                                           |            |
|----------------------------------------------|----------|---------------------------------------------------------------------------|----------|----------------------------------------------|----------|---------------------------------------------------------------------------|------------|
| Zn <sub>1</sub> -O <sub>1</sub>              | 1.939(5) | O <sub>1</sub> -Zn <sub>1</sub> -O <sub>1</sub> <sup>i</sup>              | 106.2(3) | Co <sub>1</sub> -O <sub>1</sub>              | 1.930(2) | O <sub>1</sub> -Co <sub>1</sub> -O <sub>1</sub> <sup>i</sup>              | 108.90(15) |
| Zn <sub>1</sub> -O <sub>1</sub> <sup>i</sup> | 1.939(5) | O <sub>1</sub> -Zn <sub>1</sub> -N <sub>1</sub>                           | 114.4(2) | Co <sub>1</sub> -O <sub>1</sub> <sup>i</sup> | 1.930(2) | O <sub>1</sub> -Co <sub>1</sub> -N <sub>1</sub>                           | 114.73(11) |
| Zn <sub>1</sub> -N <sub>1</sub>              | 1.974(5) | O <sub>1</sub> <sup>i</sup> -Zn <sub>1</sub> -N <sub>1</sub>              | 100.2(2) | Co <sub>1</sub> -N <sub>1</sub>              | 1.995(3) | O <sub>1</sub> <sup>i</sup> -Co <sub>1</sub> -N <sub>1</sub>              | 100.23(1)  |
| Zn <sub>1</sub> -N <sub>1</sub> <sup>i</sup> | 1.974(5) | O <sub>1</sub> -Zn <sub>1</sub> -N <sub>1</sub> <sup>i</sup>              | 100.2(2) | Co <sub>1</sub> -N <sub>1</sub> <sup>i</sup> | 1.995(3) | O <sub>1</sub> -Co <sub>1</sub> -N <sub>1</sub> <sup>i</sup>              | 100.23(11) |
|                                              |          | O <sub>1</sub> <sup>i</sup> -Zn <sub>1</sub> -N <sub>1</sub> <sup>i</sup> | 114.4(2) |                                              |          | O <sub>1</sub> <sup>i</sup> -Co <sub>1</sub> -N <sub>1</sub> <sup>i</sup> | 114.73(11) |
|                                              |          | N <sub>1</sub> -Zn <sub>1</sub> -N <sub>1</sub> <sup>i</sup>              | 121.0(4) |                                              |          | N <sub>1</sub> -Co <sub>1</sub> -N <sub>1</sub> <sup>i</sup>              | 118.35(18) |
| <b>Compound 3</b>                            |          |                                                                           |          | <b>Compound 4</b>                            |          |                                                                           |            |

|                                                                              |            |                                                                 |                                                  |            |                                                                 |            |
|------------------------------------------------------------------------------|------------|-----------------------------------------------------------------|--------------------------------------------------|------------|-----------------------------------------------------------------|------------|
| Ni <sub>1</sub> -O <sub>3</sub> <sup>ii</sup>                                | 2.021(3)   | N <sub>3</sub> <sup>iii</sup> -Ni <sub>1</sub> -O <sub>2</sub>  |                                                  |            | O <sub>4</sub> -Cu <sub>1</sub> -N <sub>1</sub>                 | 94.21(14)  |
| Ni <sub>1</sub> -N <sub>3</sub> <sup>iii</sup>                               | 2.056(4)   | 89.10(15)                                                       | Cu <sub>1</sub> -O <sub>3</sub>                  |            | O <sub>3A</sub> -Cu <sub>1</sub> -N <sub>1</sub>                | 94.31(14)  |
| Ni <sub>1</sub> -N <sub>1</sub>                                              | 2.059 (4)  | N <sub>1</sub> -Ni <sub>1</sub> -O <sub>2</sub>                 | 1.969(3)                                         |            | O <sub>4A</sub> -Cu <sub>1</sub> -N <sub>1</sub>                | 98.50(14)  |
| Ni <sub>1</sub> -O <sub>1W</sub>                                             | 2.098(4)   | 163.82(14)                                                      | Cu <sub>1</sub> -O <sub>4</sub>                  |            | O <sub>3</sub> -Cu <sub>1</sub> -Cu <sub>1</sub> <sup>iv</sup>  | 82.27(10)  |
| Ni <sub>1</sub> -O <sub>2</sub>                                              | 2.117(3)   | O <sub>1W</sub> -Ni <sub>1</sub> -O <sub>2</sub>                | 1.970(3)                                         |            | O <sub>4</sub> -Cu <sub>1</sub> -Cu <sub>1</sub> <sup>iv</sup>  | 84.75(10)  |
| Ni <sub>1</sub> -O <sub>1</sub>                                              | 2.148(3)   | 87.06(14)                                                       | Cu <sub>1</sub> -O <sub>3A</sub>                 |            | O <sub>3A</sub> -Cu <sub>1</sub> -Cu <sub>1</sub> <sup>iv</sup> | 80.77(10)  |
| Ni <sub>1</sub> -C <sub>24</sub>                                             | 2.476(5)   | O <sub>3</sub> <sup>ii</sup> -Ni <sub>1</sub> -O <sub>1</sub>   | 1.972(3)                                         |            | O <sub>4A</sub> -Cu <sub>1</sub> -Cu <sub>1</sub> <sup>iv</sup> | 86.41(10)  |
| O <sub>3</sub> <sup>ii</sup> -Ni <sub>1</sub> -N <sub>3</sub> <sup>iii</sup> | 88.03(14)  | 155.47(13)                                                      | Cu <sub>1</sub> -O <sub>4A</sub>                 |            | N <sub>1</sub> -Cu <sub>1</sub> -Cu <sub>1</sub> <sup>iv</sup>  | 175.00(11) |
| O <sub>3</sub> <sup>ii</sup> -Ni <sub>1</sub> -N <sub>1</sub>                | 102.63(15) | N <sub>3</sub> <sup>iii</sup> -Ni <sub>1</sub> -O <sub>1</sub>  | 2.158(4)                                         |            | O <sub>1</sub> -Cu <sub>2</sub> -O <sub>2A</sub>                | 88.90(14)  |
| N <sub>3</sub> <sup>iii</sup> -Ni <sub>1</sub> -N <sub>1</sub>               | 93.07(16)  | 91.36(14)                                                       | Cu <sub>1</sub> -Cu <sub>1</sub> <sup>iv</sup>   |            | O <sub>1</sub> -Cu <sub>2</sub> -O <sub>2</sub>                 | 166.75(13) |
| O <sub>3</sub> <sup>ii</sup> -Ni <sub>1</sub> -O <sub>1W</sub>               | 91.24(14)  | N <sub>1</sub> -Ni <sub>1</sub> -O <sub>1</sub>                 | 2.6935(11)                                       |            | O <sub>2A</sub> -Cu <sub>2</sub> -O <sub>2</sub>                | 88.22(14)  |
| N <sub>3</sub> <sup>iii</sup> -Ni <sub>1</sub> -O <sub>1W</sub>              | 176.04(16) | O <sub>1W</sub> -Ni <sub>1</sub> -O <sub>1</sub>                | 1.960(3)                                         |            | O <sub>1</sub> -Cu <sub>2</sub> -O <sub>1A</sub>                | 89.00(14)  |
| N <sub>1</sub> -Ni <sub>1</sub> -O <sub>1W</sub>                             | 90.88(16)  | 87.69(13)                                                       | Cu <sub>2</sub> -O <sub>1</sub>                  |            | O <sub>2A</sub> -Cu <sub>2</sub> -O <sub>1A</sub>               | 167.26(14) |
| O <sub>3</sub> <sup>ii</sup> -Ni <sub>1</sub> -O <sub>2</sub>                | 93.47(13)  | O <sub>2</sub> -Ni <sub>1</sub> -O <sub>1</sub>                 | Cu <sub>2</sub> -O <sub>2A</sub>                 | 1.971(3)   | O <sub>2</sub> -Cu <sub>2</sub> -O <sub>1A</sub>                | 90.97(14)  |
|                                                                              |            | 62.00(12)                                                       | Cu <sub>2</sub> -O <sub>2</sub>                  | 1.972(3)   | O <sub>1</sub> -Cu <sub>2</sub> -N <sub>3</sub>                 | 97.23(14)  |
|                                                                              |            | O <sub>3</sub> <sup>ii</sup> -Ni <sub>1</sub> -C <sub>24</sub>  | Cu <sub>2</sub> -O <sub>1A</sub>                 |            | O <sub>2A</sub> -Cu <sub>2</sub> -N <sub>3</sub>                | 99.88(15)  |
|                                                                              |            | 124.28(15)                                                      | 1.981(3)                                         |            | O <sub>2</sub> -Cu <sub>2</sub> -N <sub>3</sub>                 | 96.00(14)  |
|                                                                              |            | N <sub>3</sub> <sup>iii</sup> -Ni <sub>1</sub> -C <sub>24</sub> | Cu <sub>2</sub> -N <sub>3</sub>                  |            | O <sub>1A</sub> -Cu <sub>2</sub> -N <sub>3</sub>                | 92.85(15)  |
|                                                                              |            | 89.99(16)                                                       | 2.142(4)                                         |            | O <sub>1</sub> -Cu <sub>2</sub> -Cu <sub>2</sub> <sup>v</sup>   | 85.76(10)  |
|                                                                              |            | N <sub>1</sub> -Ni <sub>1</sub> -C <sub>24</sub>                | Cu <sub>2</sub> -Cu <sub>2</sub> <sup>v</sup>    | 2.6824(11) | O <sub>2A</sub> -Cu <sub>2</sub> -Cu <sub>2</sub> <sup>v</sup>  | 89.11(10)  |
|                                                                              |            | 133.07(16)                                                      | O <sub>3</sub> -Cu <sub>1</sub> -O <sub>4</sub>  |            |                                                                 |            |
|                                                                              |            | O <sub>1W</sub> -N <sub>1</sub> -C <sub>24</sub>                | 167.00(13)                                       |            |                                                                 |            |
|                                                                              |            | 87.20(15)                                                       | O <sub>3</sub> -Cu <sub>1</sub> -O <sub>3A</sub> |            |                                                                 |            |
|                                                                              |            | O <sub>2</sub> -Ni <sub>1</sub> -C <sub>24</sub>                | 90.62(14)                                        |            |                                                                 |            |
|                                                                              |            | 30.82(14)                                                       | O <sub>4</sub> -Cu <sub>1</sub> -O <sub>3A</sub> |            |                                                                 |            |
|                                                                              |            | O <sub>1</sub> -Ni <sub>1</sub> -C <sub>24</sub>                | 88.02(13)                                        |            |                                                                 |            |
|                                                                              |            | 31.19(14)                                                       | O <sub>3</sub> -Cu <sub>1</sub> -O <sub>4A</sub> |            |                                                                 |            |
|                                                                              |            |                                                                 | 87.78(14)                                        |            |                                                                 |            |
|                                                                              |            |                                                                 | O <sub>4</sub> -Cu <sub>1</sub> -O <sub>4A</sub> |            |                                                                 |            |
|                                                                              |            |                                                                 | 90.69(13)                                        |            |                                                                 |            |
|                                                                              |            |                                                                 | O <sub>3A</sub> -Cu <sub>1</sub> -               |            |                                                                 |            |
|                                                                              |            |                                                                 | O <sub>4A</sub>                                  | 167.18(13) |                                                                 |            |
|                                                                              |            |                                                                 | O <sub>3</sub> -Cu <sub>1</sub> -N <sub>1</sub>  |            |                                                                 |            |
|                                                                              |            |                                                                 | 98.78(14)                                        |            |                                                                 |            |

| Compound 5                                                    |          |                                                                                            | Compound 6                                                   |            |                                                                                              |
|---------------------------------------------------------------|----------|--------------------------------------------------------------------------------------------|--------------------------------------------------------------|------------|----------------------------------------------------------------------------------------------|
| Zn <sub>1</sub> -O <sub>1</sub> <sup>vi</sup>                 | 1.898(3) | O <sub>1</sub> <sup>vi</sup> -Zn <sub>1</sub> -O <sub>1</sub><br>110.6(2)                  | Co <sub>1</sub> -O <sub>1</sub>                              | 1.919(3)   | O <sub>1</sub> -Co <sub>1</sub> -O <sub>1</sub> <sup>vii</sup> 110.8(2)                      |
| Zn <sub>1</sub> -O <sub>1</sub>                               | 1.898(3) | O <sub>1</sub> <sup>vi</sup> -Zn <sub>1</sub> -<br>N <sub>1</sub> <sup>vi</sup> 109.41(12) | Co <sub>1</sub> -O <sub>1</sub> <sup>vii</sup>               | 1.919(3)   | O <sub>1</sub> -Co <sub>1</sub> -<br>N <sub>1</sub> <sup>vii</sup> 107.85(12)                |
| Zn <sub>1</sub> -N <sub>1</sub> <sup>vi</sup>                 | 1.982(3) | O <sub>1</sub> -Zn <sub>1</sub> -N <sub>1</sub> <sup>vi</sup><br>108.23(11)                | Co <sub>1</sub> -N <sub>1</sub> <sup>vii</sup>               | 1.984(3)   | O <sub>1</sub> <sup>vii</sup> -Co <sub>1</sub> -<br>N <sub>1</sub> <sup>vii</sup> 110.32(13) |
| Zn <sub>1</sub> -N <sub>1</sub>                               | 1.982(3) | O <sub>1</sub> <sup>vi</sup> -Zn <sub>1</sub> -N <sub>1</sub><br>108.23(11)                | Co <sub>1</sub> -N <sub>1</sub>                              | 1.984(3)   | O <sub>1</sub> -Co <sub>1</sub> -<br>N <sub>1</sub> 110.32(13)                               |
|                                                               |          | O <sub>1</sub> -Zn <sub>1</sub> -N <sub>1</sub><br>109.41(12)                              |                                                              |            | O <sub>1</sub> <sup>vii</sup> -Co <sub>1</sub> -<br>N <sub>1</sub> 107.85(12)                |
|                                                               |          | N <sub>1</sub> <sup>vi</sup> -Zn <sub>1</sub> -N <sub>1</sub><br>110.99(16)                |                                                              |            | N <sub>1</sub> <sup>vii</sup> -Co <sub>1</sub> -N <sub>1</sub><br>109.69(18)                 |
| Compound 7                                                    |          |                                                                                            | Compound 8                                                   |            |                                                                                              |
| Cd <sub>1</sub> -O <sub>2</sub>                               | 2.282(3) | O <sub>4</sub> -Cd <sub>1</sub> -O <sub>3</sub> 54.16(10)                                  | Ni <sub>1</sub> -N <sub>1</sub>                              | 2.100(3)   | O <sub>1</sub> -Ni <sub>1</sub> -O <sub>1</sub> 172.87(16)                                   |
| Cd <sub>1</sub> -N <sub>1</sub>                               | 2.301(3) | N <sub>3</sub> -Cd <sub>1</sub> -O <sub>3</sub> 78.22(9)                                   | Ni <sub>1</sub> -O <sub>1</sub>                              | 2.1034(15) | N <sub>1</sub> -Ni <sub>1</sub> -N <sub>3</sub> 176.67(14)                                   |
| Cd <sub>1</sub> -O <sub>4</sub>                               | 2.351(3) | O <sub>2</sub> -Cd <sub>1</sub> -O <sub>1</sub> 96.04(9)                                   | Ni <sub>1</sub> -N <sub>3</sub>                              | 2.110(3)   | N <sub>1</sub> -Ni <sub>1</sub> -N <sub>3</sub> 90.40(8)                                     |
| Cd <sub>1</sub> -N <sub>3</sub>                               | 2.370(3) | N <sub>1</sub> -Cd <sub>1</sub> -O <sub>1</sub> 82.35(9)                                   | N <sub>1</sub> -Ni <sub>1</sub> -N <sub>1</sub><br>92.92(16) |            | O <sub>1</sub> -Ni <sub>1</sub> -N <sub>3</sub> 86.19(9)                                     |
| Cd <sub>1</sub> -O <sub>3</sub>                               | 2.474(3) | O <sub>4</sub> -Cd <sub>1</sub> -O <sub>1</sub> 74.97(10)                                  | N <sub>1</sub> -Ni <sub>1</sub> -O <sub>1</sub>              | 93.73(9)   | O <sub>1</sub> -Ni <sub>1</sub> -N <sub>3</sub> 88.60(9)                                     |
| Cd <sub>1</sub> -O <sub>1</sub>                               | 2.545(3) | N <sub>3</sub> -Cd <sub>1</sub> -O <sub>1</sub> 176.88(9)                                  | N <sub>1</sub> -Ni <sub>1</sub> -O <sub>1</sub>              | 91.18(9)   | N <sub>3</sub> -Ni <sub>1</sub> -N <sub>3</sub> 86.27(15)                                    |
| Cd <sub>1</sub> -C <sub>25</sub>                              | 2.744(4) | O <sub>3</sub> -Cd <sub>1</sub> -O <sub>1</sub> 104.57(8)                                  |                                                              |            |                                                                                              |
| O <sub>2</sub> -Cd <sub>1</sub> -N <sub>1</sub><br>126.86(10) |          | O <sub>2</sub> -Cd <sub>1</sub> -C <sub>25</sub><br>111.31(12)                             | Compound 9                                                   |            |                                                                                              |
| O <sub>2</sub> -Cd <sub>1</sub> -O <sub>4</sub> 90.29(10)     |          | N <sub>1</sub> -Cd <sub>1</sub> -C <sub>25</sub><br>121.77(11)                             | Cu <sub>1</sub> -O <sub>1</sub>                              | 1.9730(15) | N <sub>1</sub> -Cu <sub>1</sub> -O <sub>4</sub> 162.74(7)                                    |
| N <sub>1</sub> -Cd <sub>1</sub> -O <sub>4</sub><br>138.43(10) |          | O <sub>4</sub> -Cd <sub>1</sub> -C <sub>25</sub> 26.99(11)                                 | Cu <sub>1</sub> -N <sub>1</sub>                              | 1.9795(17) | O <sub>1</sub> -Cu <sub>1</sub> -O <sub>3</sub> 145.57(7)                                    |
| O <sub>2</sub> -Cd <sub>1</sub> -N <sub>3</sub> 83.00(10)     |          | N <sub>3</sub> -Cd <sub>1</sub> -C <sub>25</sub> 93.21(11)                                 | Cu <sub>1</sub> -O <sub>4</sub>                              | 2.0108(17) | N <sub>1</sub> -Cu <sub>1</sub> -O <sub>3</sub> 102.17(7)                                    |
| N <sub>1</sub> -Cd <sub>1</sub> -N <sub>3</sub> 95.84(10)     |          | O <sub>3</sub> -Cd <sub>1</sub> -C <sub>25</sub> 27.18(11)                                 | Cu <sub>1</sub> -O <sub>3</sub>                              | 2.0287(17) | O <sub>4</sub> -Cu <sub>1</sub> -O <sub>3</sub> 64.57(7)                                     |
| O <sub>4</sub> -Cd <sub>1</sub> -N <sub>3</sub><br>107.96(10) |          | O <sub>1</sub> -Cd <sub>1</sub> -C <sub>25</sub> 89.90(11)                                 | Cu <sub>1</sub> -N <sub>3</sub>                              | 2.1911(18) | O <sub>1</sub> -Cu <sub>1</sub> -N <sub>3</sub> 104.40(7)                                    |
| O <sub>2</sub> -Cd <sub>1</sub> -O <sub>3</sub><br>130.45(10) |          |                                                                                            | O <sub>1</sub> -Cu <sub>1</sub> -N <sub>1</sub><br>90.47(7)  |            | N <sub>1</sub> -Cu <sub>1</sub> -N <sub>3</sub> 97.29(7)                                     |
| N <sub>1</sub> -Cd <sub>1</sub> -O <sub>3</sub> 100.55(9)     |          |                                                                                            | O <sub>1</sub> -Cu <sub>1</sub> -O <sub>4</sub>              | 95.25(7)   | O <sub>4</sub> -Cu <sub>1</sub> -N <sub>3</sub> 97.03(8)                                     |
|                                                               |          |                                                                                            |                                                              |            | O <sub>3</sub> -Cu <sub>1</sub> -N <sub>3</sub> 105.53(7)                                    |



Symmetry operations: (i)  $-y+1, -x+1, -z+1/6$ ; (ii)  $x+1/2, y-1/2, z$ ; (iii)  $-x-1, y, -z+1/2$ ; (iv)  $-x, -y, -z$ ; (v)  $-x-1, -y+1, -z+1$ ; (vi)  $-x+5/4, y, -z+1/4$ ; (vii)  $-x+1/4, y, -z+1/4$ .
